1  
2  
3  
4  
5  
6  
7  
8  
9  
10  
11  
12  
13  
14  
15  
16  
17  
18  
19  
20

**Improved methods for protein and single-molecule RNA detection in *C. elegans* embryos**

Dylan M. Parker<sup>1</sup>, Lindsay P. Winkenbach<sup>1</sup>, Annemarie Parker<sup>1</sup>, Sam Boyson<sup>1</sup>, and Erin Osborne Nishimura<sup>1,\*</sup>

<sup>1</sup> Department of Biochemistry and Molecular Biology, Colorado State University, Fort Collins, CO, USA 80523

\*Correspondence: [erin.nishimura@colostate.edu](mailto:erin.nishimura@colostate.edu)

21 **ABSTRACT:**

22 Visualization of gene products in *Caenorhabditis elegans* has provided insights into the  
23 molecular and biological functions of many novel genes in their native contexts. Single-molecule  
24 Fluorescence *In Situ* Hybridization (smFISH) and Immunofluorescence (IF) visualize the  
25 abundance and localization of mRNAs and proteins, respectively, allowing researchers to  
26 elucidate the localization, dynamics, and functions of many genes. Here, we describe several  
27 improvements and optimizations to existing IF and smFISH approaches specifically for use in *C.*  
28 *elegans* embryos. We present 1) optimized fixation and permeabilization steps to preserve  
29 cellular morphology while maintaining probe and antibody accessibility, 2) a streamlined, in-  
30 tube approach that negates freeze-cracking, 3) the smiFISH (single molecule inexpensive FISH)  
31 adaptation that reduces cost, 4) an assessment of optimal anti-fade products, and 5)  
32 straightforward quantification and data analysis methods. Most importantly, published IF and  
33 smFISH protocols have predominantly been mutually exclusive, preventing exploration of  
34 relationships between an mRNA and a relevant protein in the same sample. Here, we present  
35 methods to combine IF and smFISH protocols in *C. elegans* embryos including an efficient  
36 method harnessing nanobodies. Finally, we discuss tricks and tips to help the reader optimize and  
37 troubleshoot individual steps in each protocol.

38

39 **1. INTRODUCTION:**

40 **1.1 Microscopic methods for RNA and protein visualization in *C. elegans***

41 The spatial and temporal patterns of gene expression in *C. elegans* can provide fundamental  
42 insights into their function and importance. By querying the abundance and spatial patterning of  
43 mRNA and their protein products in whole animals it is possible to gain insight to their  
44 transcription and translation, mRNA stability, modification states of protein, developmental  
45 regulation, and their functional roles<sup>1-5</sup>. Visualizing RNA and protein in the same intact animal  
46 requires methods that are sensitive, non-perturbative, and, most importantly, compatible with one  
47 another. Traditional approaches to visualizing mRNA and protein simultaneously have either  
48 relied on the visibility of a GFP-tagged protein to persist under RNA labeling conditions; or they  
49 involve combining IF with low resolution FISH protocols. Here, we introduce methods that  
50 improve upon existing *in situ* RNA and protein visualization protocols allowing for concurrent  
51 imaging of a wide array of proteins and mRNA with state-of-the-art resolution.

52

53 The current gold standard for *in situ* single-molecule RNA detection is single-molecule  
54 Fluorescence *in situ* hybridization (smFISH). In smFISH, single-molecule RNA visualization  
55 occurs by annealing a series of ~24-48 fluorescently-labeled short antisense oligonucleotide  
56 probes to a transcript of interest in fixed animals<sup>6-8</sup>. Annealing multiple fluorescent probes to an  
57 RNA produces a discrete, punctate signal for each individual molecule of RNA *in situ*. Labeling  
58 each RNA in this manner permits quantification of both the abundance and localization of  
59 individual molecules of RNA. Conventional smFISH protocols have successfully characterized  
60 RNA expression in *C. elegans*; however, they are challenged by low signal due to poor  
61 photostability for some fluorophores and high background<sup>9</sup> The probes are also costly. We  
62 remedy these issues by optimizing the standard smFISH protocol for *C. elegans*, including  
63 comparisons of commercial and homemade reagents, rigorous testing of various antifade  
64 compounds, and implementation of a recently developed protocol, single molecule inexpensive  
65 Fluorescence *In Situ* Hybridization (smiFISH) to reduce cost<sup>10</sup>.

66

67 Visualization of endogenous protein expression by immunofluorescence (IF) has also proved to  
68 be an indispensable biological tool in *C. elegans*. IF has several benefits in contrast to other  
69 protein detection assays. For instance, western blots provide protein abundance and biochemical  
70 information but lack any spatial resolution. However, worm embryos pose a challenge for IF  
71 experiments due to their strong eggshell and robust permeability barrier<sup>11,12</sup>. Ultimately, this has  
72 resulted in adapted protocols requiring harsh fixatives (aldehydes, picric acid), reducing reagents  
73 (B-mercaptoethanol, DTT), enzymatic treatments (collagenase), and demanding a high degree of  
74 finesse for freeze-crack permeabilization<sup>11,13</sup>. To overcome these challenges, we have adapted  
75 strategies for use in the *C. elegans* embryo with comparatively mild chemical treatments  
76 allowing antibody penetration while leaving protein epitopes intact using a simple one-tube  
77 protocol.

78

79 Perhaps most importantly, we provide a protocol that combines both IF and smFISH in *C.*  
80 *elegans* embryos. While it is sometimes possible to visualize RNA and protein simultaneously  
81 with a standard smFISH protocol through the use of fluorescently tagged proteins, tags like GFP  
82 can often bleach during fixation. Moreover, conventional methods of smFISH and IF in worms

83 have been challenging to perform in the same sample, resulting in few published protocols. By  
84 optimizing the combined protocol, we have co-imaged single-molecules of RNA in conjunction  
85 with the proteins they produce *in situ* in whole animals. Our approach is to first perform  
86 immunofluorescence followed by smFISH, with key modifications. RNA quality and FISH  
87 probe permeability are maintained by using mild fixation conditions and chemical treatments  
88 compatible with immunofluorescence while employing RNase free reagents throughout the  
89 protocol. Notably, for some antibody variants, such as nanobodies, a simplified protocol can  
90 sometime be utilized. We present the technical details for each protocol individually, in  
91 combination, user-friendly ways to analyze the data, standard controls, and some options for  
92 troubleshooting. We present several related protocols for the reader to choose between (Figure  
93 1). This includes a comprehensive protocol to perform sample prep, immunofluorescence,  
94 smFISH, and slide preparation in series (Figure 1, Protocol 1). Additional protocols also describe  
95 smFISH or smiFISH alone (Protocol 2), immunofluorescence alone (Protocol 3), or an  
96 alternative simultaneous immunofluorescence/smFISH approach using nanobodies (Protocol 4).

97

## 98 **2. EXPERIMENTAL DESIGN, CONSIDERATIONS, AND DATA ANALYSIS:**

99 **2.1 Sample Preparation and Fixation.** IF and smFISH have been performed using various  
100 fixation conditions in *C. elegans* and other model systems. Common fixatives include  
101 formaldehyde/formalin or organic solvents such as methanol, ethanol, and acetone.  
102 Formaldehyde/formalin acts by creating crosslinked, covalent chemical bonds in the sample,  
103 primarily at lysine residues. Formalin can also cause C-T and G-A mutations on DNA sequences  
104 as characterized by PCR<sup>14</sup>. Moreover, formaldehyde/formalin-fixation affects tertiary amines in  
105 RNA sequences resulting in modification of up to nearly 40 % of As and Cs in formalin-fixed  
106 tissues<sup>15</sup>. Due to the high degree of alteration that occurs on nucleic acids,  
107 formaldehyde/formalin-fixation is not an ideal fixative for nucleic acid visualization. As an  
108 alternative to crosslinking-fixatives, alcohols and other organic solvents have been identified as  
109 superior nucleic acid-fixatives<sup>16</sup>. Alcohols and organic solvents, such as ethanol, methanol, and  
110 acetone, function by dehydrating clathrate water molecules around proteins and nucleic acids,  
111 thus precipitating biological molecules into a fixed state without significant chemical alteration.  
112 As with crosslinking fixatives, alcohols and organic solvents have their detriments. These  
113 fixatives can disrupt cell membrane structures, cytoplasmic organelles, and soluble cell structural



114 elements such as microtubules<sup>17,18</sup>. However, due to their preservation of nucleic acid  
115 composition, they are ideal fixatives for single-molecule RNA detection assays. Further, we have  
116 found that short fixations using these types of fixatives allow efficient antibody penetration and  
117 do not appear to cause disruption to the protein epitopes we have targeted through IF as some  
118 previous studies have shown<sup>19</sup>.

119

120 **2.2 Immunofluorescence.** IF has been a staple of *C. elegans* experimentation for decades. As a  
121 result, a variety of methods for performing IF have been developed, providing information and  
122 protocols for antigen production, peptide coupling, antibody purification, fixation conditions, and  
123 protocols related to IF in *C. elegans*<sup>11,20,21</sup>. However, the majority of these methods have focused  
124 on the use of larval stages of development, and are not optimized for embryos. Most protocols use  
125 some combination of reducing reagents, enzymatic treatments, formaldehyde fixation, and  
126 “Freeze-Cracking” mechanical disruption – compressing samples between slides, not to be  
127 confused with freeze-cracking of the eggshell in liquid nitrogen –<sup>13</sup>. Here we present a single-  
128 tube protocol requiring no reducing reagents or enzymatic treatments and utilizing a light  
129 methanol/acetone fixation and liquid nitrogen cracking to permeabilize the eggshell. We  
130 demonstrate this protocol using the anti-PGL-1 antibody K76<sup>20</sup> (DHSB, Antibody registry ID  
131 AB\_531836) and the anti-ELT-2 antibody 455-2A4<sup>22</sup> (DHSB, Antibody Registry ID:  
132 AB\_2618114) (**FIGURE 2**).

133

134 **2.3 smFISH and smiFISH.** Single-molecule RNA Fluorescence in situ Hybridization (smFISH)  
135 has provided insights into the regulation of transcripts in *C. elegans* at all stages of development.  
136 smFISH probes can be designed and synthesized in the lab<sup>8,9</sup> or ordered as a set from Biosearch  
137 Technologies (Novato, CA). Some typical fluorophores include Cy5, Quasar 670, Alexa 594, Cal  
138 Fluor 610, and Fluorescein, among many others. In general, we have had the best signal to noise  
139 and most photostable fluorescence using Quasar 670 and Cal Fluor 610, which also work well in  
140 experiments probing for two RNAs. Fluorescein tends to have very low signal-to-noise ratios.

141 Because each probe in a set requires chemical conjugation with fluorophores for each  
142 specific transcript to be imaged, smFISH probe sets are relatively expensive<sup>6,7,10</sup>. Targeting a  
143 single RNA typically costs in the range of ~\$500. Recently, Tsanov et al. outlined a  
144 straightforward, flexible method for reducing the cost of single-molecule RNA detection: single-

145 molecule inexpensive Fluorescence In Situ Hybridization (smiFISH). smiFISH brings down the  
146 cost of single molecule RNA detection by taking advantage of a single, universal fluorophore-  
147 labeled secondary probe annealed *in vitro* to gene-specific primary probes (Figure 3A). Primary  
148 smiFISH probes contain two main parts facilitating efficacy and cost reduction: the gene-specific  
149 region complementary to the transcript of interest and the FLAP region complementary to the  
150 fluorescently-labeled secondary probe. *In situ*, the complementary region of the primary probes  
151 bind to the target RNA while it's FLAP region is annealed to a fluorophore-labeled secondary  
152 FLAP probe. This regime significantly reduces the cost of single-molecule RNA visualization by  
153 eliminating the need to create chemically conjugated probe sets for each specific target RNA. To  
154 test whether smiFISH performs as well as traditional smFISH in *C. elegans* embryos, we  
155 compared *nos-2* or *imb-2* smFISH and smiFISH probes in the same sample (FIGURE 3). We  
156 found that smiFISH faithfully reproduces the sensitivity, spatial resolution, and reliability of  
157 smFISH probes. We have found that in larval stages smiFISH is less effective than smFISH  
158 using our standard protocols, possibly due to lower larval permeability preventing smiFISH  
159 probe entry.

160

161 **2.4 smiFISH probe design.** smiFISH primary probes can be designed as described Tsanov et al.  
162 2016 using the R script Oligostan. Primary probes can be ordered in 96-well plates from IDT on  
163 the 25 nmol scale prediluted to 100 uM in IDTE buffer pH 8.0. Alternatively, if ordering 96 or  
164 more individual probes, oligos can be ordered on the 500 pm scale, which still provides ample  
165 primary probes for hundreds of experiments. For most experiments, ~12-16 primary probes per  
166 transcript is sufficient, although testing as few as 8 primary probes has produced discernable  
167 single-molecule spots in *C. elegans* embryos. An increased number of primary probes typically  
168 increases the signal-to-noise ratio for any given transcript. Secondary FLAP probes (see  
169 smiFISH below) can also be ordered as 5' and/or 3' single- or dual-fluorophore-labeled oligos  
170 from either Biosearch Technologies or IDT (Coralville, Iowa).

171

172 **2.5 Optimizing signal-to-noise in smFISH and smiFISH samples.** In RNA FISH experiments,  
173 it is crucial to obtain the highest possible signal-to-noise ratio (SNR) to ensure reliable  
174 interpretation of the data. One common question surrounding smFISH is whether commercial  
175 reagents (i.e., Stellaris) are superior to homemade reagents<sup>7,9</sup>. By comparing the signal-to-noise

176 ratio of four transcripts imaged by smFISH using homemade buffers or Stellaris buffers, we  
177 found Stellaris buffers perform significantly better for all four transcripts, ranging from 15-25%  
178 improvement in average SNR compared with homemade buffers. (**FIGURE 4**). Another  
179 common concern with smFISH experiments is photolability. Due to the relatively low signal,  
180 high laser powers, and small number of fluorophores (~24-48) utilized in smFISH experiments,  
181 photobleaching can occur rapidly. Photobleaching is of particular concern with thick samples  
182 that must be imaged through many Z stacks, as is the case with *C. elegans* embryos (~12-20 um  
183 thickness as prepared in Protocol 1: 3.1.4, or ~60-100 stacks per embryo at 0.2 um spacing  
184 between z-stacks). One of the primary causes of photobleaching is degradation of fluorophore  
185 molecules by oxygen radicals produced upon laser excitation<sup>23</sup>. Therefore, free-radical  
186 scavenging antifades are commonly used to reduce the degree of experimentally-induced  
187 photobleaching. We tested combinations of antifades to determine the optimal reagents for  
188 maintaining high signal-to-noise throughout an experiment. Through these experiments, we  
189 found that the optimal antifade solution can vary depending on the probe set or fluorophore  
190 (**FIGURE 5**). In our hands, vectashield, N-propyl gallate, or a mixture of the two, provided the  
191 best signal stability for Cal Fluor 610 and Quasar 670 labeled RNAs in *C. elegans* embryos.

192  
193 **2.6 Sequential IF/FISH protocol.** Simultaneous detection of an RNA and its cognate protein  
194 reveals a wealth of information regarding the expression patterns, regulation, and functions of  
195 genes. However, the combination of IF and FISH is often challenging due to slight  
196 incompatibilities in traditional protocols. Typically combined IF/FISH protocols require specific  
197 tailoring to the system of interest<sup>24-26</sup>. This includes one protocol designed for the extruded *C.*  
198 *elegans* gonad, which requires hand dissection of individual animals and careful slide  
199 preparation<sup>27</sup>. When immunofluorescence is performed in series with smFISH all reagents must  
200 be RNase free where possible. Steps containing BSA must be treated with an RNase inhibitor to  
201 prevent RNA degradation. We demonstrate a sequential IF/FISH protocol using the anti-PGL-1  
202 antibody, K76 and smFISH probes against the P granule RNAs *nos-2* (Figure 6A) and *cpg-2*  
203 (Figure 6B). Additionally we show IF/FISH results in embryos stained with the ELT-2 antibody,  
204 2A4 and hybridized with smFISH probes targeting *elt-2* RNA (Figure 6C)

205

206 **2.7 Simultaneous IF/FISH protocol.** If performing IF with a high-affinity nanobody or single  
207 chain variable fragment (ScFv), a simplified protocol can often be utilized. Under these  
208 circumstances, the FISH protocol (Protocol 3) can be followed with the caveat that fluorescently  
209 labeled nanobody or ScFv can be added directly to the hybridization buffer in step 4 and  
210 incubated with the FISH probes and sample overnight to perform IF. It is unclear why some  
211 nanobodies and ScFv work with this simplified protocol, but it is possible that their small size  
212 compared to traditional antibodies allows better permeation during hybridization while the high-  
213 affinity of some common nanobodies/ScFv facilitate antigen recognition at the higher  
214 temperatures required for RNA FISH probe hybridization. Here we present results for  
215 simultaneous IF/FISH from embryos containing PATR-1::GFP (Figure 7). The embryos were  
216 stained with a Janelia Fluor 549 (Tocris cat. no. 6147) labeled anti-GFP nanobody (Chromotek,  
217 gt-250) in hybridization buffer along with smFISH probes targeting *nos-2* RNA.

218

## 219 **2.8 smFISH and smiFISH data analysis**

220 Depending on the biological questions at hand, there are several routes for the interpretation of  
221 smFISH data. These analyses range from simply characterizing the quality of the data, counting  
222 the number of RNAs in the samples, or even identifying spatial distributions of RNA within cells  
223 of interest.

224

225 The most common method for quantification of smFISH data is counting the number of RNAs  
226 within the sample. Some commonly used tools for this purpose are FISH-quant<sup>28</sup> and  
227 StarSearch<sup>8</sup>. These algorithms function by enhancing spot signals through various filtering  
228 methods, setting a threshold for RNA spot detection, and identifying individual spots. Thresholds  
229 are often set manually by testing a range of intensity values. When plotting these values against  
230 the number of detected spots, a plateau can often be seen corresponding to threshold values  
231 separating RNA spots from lower intensity noise. When performing spot detection analysis of  
232 smFISH data, it is imperative to ensure the SNR of the data is sufficient to identify spots  
233 unambiguously. SNR can be calculated using an ImJoy plugin, which compares the intensity of a  
234 detected spot to the surrounding background intensities (<https://github.com/fish-quant>). In our  
235 experience, if SNR values are below ~3-4, spot detection becomes less reliable. When analyzing

236 smFISH data using FISH-quant or StarSearch, if there is no clear plateau of RNA counts over  
237 various threshold values, the SNR is likely too low for accurate RNA spot detection.

238

239 As smFISH has become more widely utilized, novel methods of analysis beyond spot counting  
240 are rapidly developing. For instance, FISH-quant has been ported from Matlab to an open-source  
241 implementation in Python and successfully applied to two large-scale screen projects<sup>29,30</sup>. This  
242 package includes methods for detecting, deconvolving overlapping RNAs to increase the  
243 counting accuracy of highly abundant or clustered RNAs<sup>5,30</sup>, measuring the signal-to-noise ratio  
244 of an image (<https://github.com/fish-quant>), and even identifying diverse subcellular localization  
245 patterns of RNA<sup>30,31</sup>. Further, to facilitate its usage by non-specialists, several plugins providing  
246 user-interfaces for the data analysis platform ImJoy<sup>32</sup> were developed. As more labs adopt  
247 smFISH methodologies and more high-throughput methods of in situ RNA detection develop<sup>33–</sup>  
248 <sup>37</sup>, more sophisticated analysis methods are likely to arise. An exciting initiative is Starfish, an  
249 open-source software suite with the goal to build a unified data-analysis tool and file format for  
250 several spatial transcriptomic techniques<sup>38</sup>.

251

## 252 **2.9 IF data analysis**

253 Standard methods of analysis for IF experiments include measuring the total internal  
254 fluorescence and measuring colocalization between different markers. These methods require  
255 that imaging conditions, such as laser intensity and exposure times, are held constant across  
256 samples and replicates. We will highlight publicly available tools for analysis here; however,  
257 most microscopes ship with instrument-specific software packages capable of performing these  
258 analyses. Total internal fluorescence compares the intensity of a protein visualized by IF in a  
259 control sample and an experimental condition, such as an RNAi knockdown or protein knockout.  
260 Total internal fluorescence can be measured over the total volume of the embryo, or regions of  
261 interest can be masked either automatically or manually if specific regions must be analyzed.  
262 Regardless of whether particular segmentations are required, these analyses can be performed  
263 relatively quickly in FIJI Is Just ImageJ (FIJI)<sup>39,40</sup>. Additionally, several FIJI plugins are  
264 available to analyze a protein of interest's colocalization with another fluorescent marker. It is  
265 crucial when performing colocalization analyses to consider optimal uses for any given  
266 colocalization metric, as there are well-documented circumstances where these metrics can be

267 misleading<sup>41</sup>. Helpful instructions for segmentation, colocalization analysis, and much more can  
268 be found at <https://imagej.net/>.

269

## 270 **2.10 Combined IF/FISH data analysis**

271 As with the analysis of IF data, colocalization analyses may be performed on combined IF/FISH  
272 data. However, due to the punctate nature of FISH signal, RNA spots may not overlap with a  
273 colocalization marker as well as expected, resulting in deceptively low colocalization  
274 coefficients. This can occur for several reasons. First, the small total volume of RNA puncta can  
275 lead to high variability in colocalization. This variability is compounded by the low temporal  
276 resolution of fixed cell experiments and the stochastic movements of RNA in the cell, even for  
277 tightly localized transcripts. Moreover, because it is often not known what proteins an RNA may  
278 be directly interacting with, it can be more desirable to compare RNA distributions to a nearby  
279 landmark rather than an overlapping component. For these reasons, several groups are  
280 developing novel metrics for comparing RNA and protein data and analyzing the spatial  
281 relationships between them. For instance, by spatially modeling the coordinates of each RNA  
282 puncta and comparing their distributions to other RNAs or organelles, it is possible to identify  
283 RNA patterning at various cellular features such as cortical membranes, nuclear membranes,  
284 condensates/puncta, cellular protrusions, centrosomes, and more<sup>5,29-31</sup>.

285

## 286 **3 PROCEDURES**

---

287

288

### 289 **3.1 Protocol 1: Sequential IF/smFISH Protocol (Embryo prep + fixation, 290 immunofluorescence, smFISH, slide preparation)**

291

292 *This protocol describes methods for isolating C. elegans embryos and fixing them in a manner  
293 compatible with both immunofluorescence and RNA FISH. Steps for performing  
294 immunofluorescence subsequently followed by smFISH are then outlined. Finally, slide  
295 preparation is described. This approach can be used for simultaneous visualization of RNA  
296 transcripts and a protein of interest in the same sample provided the FISH probes and  
297 fluorescent antibody are selected in distinct channels.*

298

#### 299 **3.1.1 – Embryo Prep and Fixation**

300

##### Reagents:

301

1. 100% reagent grade acetone (Fisher cat. no. A18-500)

302

2. 100% reagent grade methanol (Fisher cat. no. A412-500)



- 303 3. Bleaching solution for use when imaging embryos (per 50 mL, make fresh):  
304 a. 40 mL deionized, distilled water  
305 b. 7.2 mL 5 M NaOH (Fisher cat. no. S318-400)  
306 c. 4.5 ml 5% NaHOCl (Ricca cat. no. 7495.5-32)  
307 4. M9 buffer  
308 a. 3 g KH<sub>2</sub>PO<sub>4</sub> (Sigma cat. no. P0662-500G)  
309 b. 6 g Na<sub>2</sub>HPO<sub>4</sub> (Sigma cat. no. RDD022-500G)  
310 c. 5 g NaCl (Fisher cat. no. S271-500)  
311 Deionized, distilled water (ddH<sub>2</sub>O) to 1 L final volume  
312 Sterilize by autoclaving.  
313 d. Add 1 ml 1 M MgSO<sub>4</sub> (Millipore cat. no. MX0075-1) using sterile technique after  
314 solution cools to prevent precipitation.  
315

316 Embryo Preparation and Fixation Protocol:

- 317 1. Grow worms to gravidity on OP50 seeded NGM plates. Synchronize by bleaching if  
318 necessary.  
319 We typically harvest one or two gravid 10 cm NGM plates seeded with ~2 ml  
320 OP50 for each slide to be made.  
321 Other bacterial stocks, such as inducible RNAi vector containing *E. coli*, can be  
322 used if desired.  
323 2. Harvest gravid worms by washing them off of plates using M9 and collect in a 15 mL  
324 conical tube in ~15 ml total volume.  
325 Aggressive pipetting will increase yield by releasing more worms from the plates.  
326 Be sure not to pierce the plate's surface as agar carried into the sample will  
327 persist.  
328 3. Spin conical at 2000 x g for 1 minute to pellet gravid worms. Alternatively, allow gravid  
329 worms to settle over time.  
330 4. Remove supernatant using a pipette or aspirator, being careful not to disturb worm pellet.  
331 5. Resuspend worm pellet in 15 mL M9.  
332 6. Spin to pellet again as above (3).  
333 7. Repeat steps 4 - 6 until the supernatant is clear, removing supernatant after the final  
334 wash.  
335 8. Add ~15 mL of bleaching solution to the worms and nutate or hand-shake for 6-8  
336 minutes until embryos are released from the mothers.  
337 Check on the condition of worms periodically throughout bleaching. The gravid  
338 adults should be broken into about two pieces before continuing. If worms are  
339 bleached for too long, some early-stage embryos may be damaged.  
340 For tips on harvesting embryos, see Porta-de-la-Riva et al. 2012<sup>42</sup>.  
341 9. Centrifuge conical at 2000 x g for 1 minute to pellet. Immediately remove supernatant  
342 and quench bleaching with 15 mL M9.  
343 At this point, embryos typically stick to the tube, and the supernatant can be  
344 carefully decanted to decrease the time before quenching.  
345 10. After adding M9, vortex the pellet to release remaining worm fragments before  
346 centrifuging at 2000 x g for 1 minute.  
347 11. Wash with 15 mL M9 two more times (for a total of 3 washes), vortexing the pellet after  
348 the addition of M9 each time.

- 349           The aroma of bleach should be completely gone by the end of washing.
- 350       12. Transfer remaining embryos to a 1.7 ml microcentrifuge tube and pellet in a tabletop
- 351           centrifuge for 30 seconds at 2000 x g. Turn tube 180° and repeat until a pellet has
- 352           formed. Remove any remaining M9.
- 353       13. Add 1 mL pure methanol cooled to -20°C, vortex to break up the pellet, and immediately
- 354           submerge in liquid nitrogen for 1 minute to crack the eggshell and promote
- 355           permeabilization.
- 356       14. Remove the tube from liquid nitrogen and immediately begin pelleting at 2000 x g in 30
- 357           sec intervals, rotating the tube 180° between each spin.
- 358           The sample will still be partially frozen for the first spins, but it is best to get the
- 359           sample pelleting early to prevent over-fixation.
- 360       15. Once the embryos are pelleted, and the sample has been in methanol for 5 min, remove
- 361           the methanol and replace it with 1 mL pure acetone cooled to -20°C. Store the sample at -
- 362           20°C for ~3 min.
- 363       16. Pellet embryos by centrifugation as in step 14.
- 364       17. After embryos have fixed in acetone for 5 min, remove the acetone and immediately
- 365           continue to IF, smFISH, smiFISH, or IF/FISH protocol.
- 366
- 367

### 3.1.2. Immunofluorescence

#### Reagents:

- 369
- 370       1. 10X PBST
- 371           a. 80 g NaCl (Fisher cat. no. S271-500)
- 372           b. 2 g KCl (Sigma cat. no. P3911-500G)
- 373           c. 14.2 g Na<sub>2</sub>HPO<sub>4</sub> (Sigma cat. no. RDD022-500G)
- 374           d. 2.4 g KH<sub>2</sub>PO<sub>4</sub> (Sigma cat. no. P0662-500G)
- 375           e. 1% Tween<sup>®</sup> 20 detergent (w/v) (Sigma cat. no. P1379-500ML)
- 376           Deionized, distilled water to 1 L final volume
- 377           Sterilize by autoclaving
- 378           Dilute to 1X in sterile deionized, distilled water
- 379
- 380       2. Bovine Serum Albumin (Sigma cat. no. A9418-5G)
- 381           a. RNase free BSA can be used if issues with RNA degradation occur with
- 382           sequential IF/smFISH protocols; however, it is much more expensive.
- 383       3. Primary antibody or fluorescently labeled nanobody/ScFv
- 384       4. Fluorescent secondary antibody (if using an unlabeled primary antibody)
- 385       5. DAPI, 4',6-Diamidino-2-Phenylindole, Dihydrochloride (Invitrogen cat. no. D1306)
- 386       6. RNasin<sup>®</sup> Ribonuclease Inhibitor (If performing IF/FISH) (Promega cat. no. N2111)
- 387       7. 20X SSC (If performing IF/FISH)
- 388           a. 800 ml deionized, distilled water
- 389           b. 175.2 g NaCl (Fisher cat. no. S271-500)
- 390           c. 88.2 g sodium citrate tribasic dihydrate (Sigma cat. no. S4641-500G)
- 391           pH to 7.0 with 1 M HCl.
- 392           Deionized, distilled water to 1 L and autoclave.
- 393           Dilute to 2X in sterile deionized, distilled water.
- 394



395 **PRELIMINARY NOTES:**

396 If performing IF/FISH, all reagents must be RNase free where possible. Steps  
397 containing BSA must be treated with an RNase inhibitor to prevent RNA  
398 degradation (see step 6 and 8).

399 Once a fluorescent antibody has been added (either primary or secondary) all  
400 subsequent steps should be carried out in the dark, ie covered in foil, to minimize  
401 fluorophore bleaching.  
402

403 Immunofluorescence Protocol:

- 404 1. Prepare fixed embryo samples as described in 3.1.1 steps 1-17.
- 405 2. Add 1 ml 1X PBST to sample and nutate for 5 min to wash.
- 406 3. Pellet embryos by centrifuging at 2000 x g in 30 sec intervals, rotating the tube 180°  
407 between each spin until pellet forms.
- 408 4. Pipet or aspirate as much of the supernatant PBST as possible without disrupting the  
409 pellet.
- 410 5. Repeat steps 2-5 two more times (3 washes total).
- 411 6. Block for 30 min. at 37°C in 50-250 ul 1X PBST containing 1% w/v BSA with nutation.  
412 **IMPORTANT:** If FISH will be performed subsequently, it is essential to add 1  
413 unit/ul RNasin® (Promega) to prevent RNA degradation during steps where BSA  
414 is included.
- 415 7. Centrifuge embryos at 2000 x g in 30 sec intervals, rotating the tube 180° between each  
416 spin until pellet forms.
- 417 8. Pipet or aspirate as much of the supernatant as possible without disrupting the pellet.
- 418 9. Apply 25-100 ul 1° antibody diluted in 1X PBST with 1% w/v BSA (and 1 unit/ul  
419 RNasin® if FISH will be performed subsequently). Nutate at room temperature for at least  
420 1-2 hrs, or overnight at 4°C.  
421 Overnight incubations will give better IF signal, but can increase RNA  
422 degradation.  
423 Optimal antibody concentrations must be determined for each antibody.
- 424 10. Add 1 ml 1X PBST directly to sample and nutate for 5 min to wash out free antibody.
- 425 11. Centrifuge embryos at 2000 x g in 30 sec intervals, rotating the tube 180° between each  
426 spin until pellet forms.
- 427 12. Pipet or aspirate as much of the supernatant PBST as possible without disrupting the  
428 pellet.
- 429 13. Repeat steps 9-11 two more times (3 washes total).
- 430 14. Apply 25-250 ul fluorescently labeled 2° antibody diluted in 1X PBST and incubate for  
431 1-2 hrs in the dark at room temperature with nutation.  
432 Optimal antibody concentrations must be determined for each antibody.
- 433 15. Add 1 ml 1X PBST and nutate for 5 min to wash out excess antibody.
- 434 16. Centrifuge embryos at 2000 x g in 30 sec intervals, rotating the tube 180° between each  
435 spin until pellet forms.
- 436 17. Pipet or aspirate as much of the supernatant PBST as possible without disrupting the  
437 pellet.
- 438 18. Repeat steps 15-17.
- 439 19. Add 1 ml 2X SSC and nutate for 5 min to equilibrate embryos in an smFISH compatible  
440 solution.

- 441 20. Centrifuge embryos at 2000 x g in 30 sec intervals, rotating the tube 180° between each  
442 spin until pellet forms.  
443 21. Pipet or aspirate as much of the supernatant SSC as possible without disrupting the pellet.  
444 22. Repeat steps 19-21.  
445 23. Continue to 3.1.3, smFISH protocol  
446

### 447 3.1.3. smFISH

#### 448 Reagents:

- 449 1. Wash Buffer A (10% volume/volume formamide)  
450 a. 600 uL Stellaris Wash Buffer A (Biosearch Technologies cat. no. SMF-WA1-  
451 60)  
452 b. 2.1 mL DEPC treated RNase free water (Invitrogen cat. no. AM9922)  
453 c. 300 uL deionized formamide (Millipore cat. no. S4117)  
454 Prepare 3 mL for each sample to be hybridized.  
455 Prepare Wash Buffer A fresh for each experiment.  
456 2. Wash Buffer B  
457 a. Stellaris Wash Buffer B (Biosearch Technologies cat. no. SMF-WB1-20  
458 Be sure to add 88 mL RNase free water (Invitrogen cat. no. AM9922) to  
459 Wash Buffer B stock before use.  
460 3. Hybridization Buffer (10% volume/volume formamide)  
461 Prepare 110 ul for each sample in an experiment  
462 Prepare hybridization buffer fresh for each experiment  
463 a. 99 uL Stellaris Hybridization Buffer (Biosearch Technologies cat. no. SMF-  
464 HB1-10/0)  
465 b. 11 uL deionized formamide (Millipore cat. no. S4117)  
466 4. Mounting Medium (5 mL)  
467 a. 2.5 mL 100% glycerol (Sigma cat. no. G5516-100ML)  
468 b. 100 mg N-propyl gallate (Sigma cat. no. 02370-100G)  
469 c. 400 ul 1 M Tris pH 8.0 (Sigma cat. no. 10708976001)  
470 N-propyl gallate is toxic.  
471 Vortex until N-propyl gallate has dissolved.  
472 Store mounting medium in amber tubes or covered in foil at either 4 or -20  
473 °C.  
474 The solution is light sensitive.  
475 Throw mounting medium away if it begins to yellow or crystalize.  
476 5. smFISH probes and/or annealed smiFISH probes  
477 6. DAPI, 4',6-Diamidino-2-Phenylindole, Dihydrochloride (Invitrogen cat. no. D1306)  
478 7. RNase free water (Invitrogen cat. no. AM9922)  
479

#### 480 smFISH Protocol:

- 481 1. Prepare fresh buffers by adding formamide to Wash Buffer A and Hybridization Buffer.  
482 Wash Buffer A and Hybridization Buffer should always have formamide added  
483 immediately preceding the experiment. Formamide can decompose over time,  
484 particularly at higher temperatures, leading to less stringent probe binding. It can  
485 also acidify when exposed to air resulting in fluorophore quenching.

- 486 Formamide stocks should be stored frozen and their pH monitored periodically  
487 (pH 7-8 is ideal)
- 488 2. Add 2 ul 1.25 uM smFISH probes (1:20 dilution of 25 uM stocks) to 110 ul hybridization  
489 buffer. If performing experiments using multiple probe sets with different fluorophores,  
490 add 2 uL of each probe set.  
491 Mix well. Hybridization buffer is viscous.  
492 Optional step: If performing Protocol 4 (simultaneous IF/FISH) using a  
493 compatible ScFv or nanobody, additionally add the appropriate concentration of  
494 ScFv or nanobody to the hybridization buffer.  
495 Note: Although 2 uL has worked well for most of the probe sets we have used, it  
496 is helpful to perform a titration over ~1 order of magnitude of concentrations to  
497 identify optimal probe concentrations on an individual probe set basis.
  - 498 3. Centrifuge embryos at 2000 x g in 30 sec intervals, rotating the tube 180° between each  
499 spin until pellet forms.
  - 500 4. Pipet or aspirate as much supernatant as possible without disturbing the pellet.
  - 501 5. Prehybridize sample in 1 mL Wash Buffer A and incubate at room temperature for ~5  
502 minutes.
  - 503 6. Centrifuge embryos at 2000 x g in 30 sec intervals, rotating the tube 180° between each  
504 spin until pellet forms.
  - 505 7. Pipet or aspirate as much supernatant as possible without disturbing the pellet.
  - 506 8. Add 100 uL hybridization buffer with probes to the pelleted embryos and hybridize at 37  
507 °C in the dark for 8-48 hours.  
508 Store prepared Wash Buffer A at room temperature or 37°C during this  
509 incubation. Warm buffer will increase the stringency of probe binding and  
510 decrease background and non-specific binding.  
511 If available, use a thermomixer to shake the hybridization solution and all  
512 subsequent washes at 450 rpm during incubation to ensure even probe  
513 penetration.
  - 514 9. Add 1 mL Wash Buffer A directly to the embryos in hybridization solution.
  - 515 10. Incubate at 37°C in the dark for 30 minutes.
  - 516 11. Centrifuge embryos at 2000 x g in 30 sec intervals, rotating the tube 180° between each  
517 spin until pellet forms.
  - 518 12. Pipet or aspirate as much supernatant as possible without disturbing the pellet.
  - 519 13. Add 1 mL Wash Buffer A containing 1 ng/uL DAPI to the sample.
  - 520 14. Incubate at 37°C in the dark for 30 minutes.
  - 521 15. Centrifuge embryos at 2000 x g in 30 sec intervals, rotating the tube 180° between each  
522 spin until pellet forms.
  - 523 16. Pipet or aspirate as much supernatant as possible without disturbing the pellet.
  - 524 17. Add 1 mL Wash Buffer B and incubate for ~5 minutes.
  - 525 18. Repeat step 15 and 16.
  - 526 19. Resuspend in 50 uL of mounting medium (or less if the sample is small) and incubate at 4  
527 °C for 30 minutes to ensure antifade penetrance.
  - 528 20. Move to slide preparation.

### 530 3.1.4 Slide Preparation:

531 Reagents:

- 532 1. VECTASHIELD mounting medium (Vector Laboratories cat. no. H-1000-10)
- 533 2. 8mm 1.5 thickness round cover glass (Electron Microscopy Sciences, cat. no. 72296-
- 534 08)
- 535 3. Glass microscope slides (VWR cat. no. 48312-401)
- 536 4. 1.5 thickness, 22X22 mm coverglass (VWR cat. no. 48366-227)
- 537 Use the appropriate thickness for your microscope.
- 538 5. Grace Bio-Lab Press-To-Seal silicon isolator (Sigma cat. no. GBL664504-25ea)
- 539

#### 540 Slide Preparation Protocol:

- 541 1. Working at a dissecting microscope, drop 2 – 6 ul of embryos suspended in mounting
- 542 medium onto a single 8 mm 1.5 thickness round cover glass resting on a glass slide.
- 543 Always wear gloves when handling slides and cover slips to prevent smudging
- 544 and contamination.
- 545 2. Add the same volume of VectaShield VECTASHIELD antifade solution and pipet up and
- 546 down to mix thoroughly. Try to keep the final volume to ~4-6 ul by removing some of
- 547 the mixture.
- 548 This is a good time to break up any large clumps of embryos by pipetting.
- 549 3. Place a 1.5 thickness 22 mm x 22 mm square cover glass on top trying to avoid bubbles.
- 550 Do not let the coverslip touch the slide. The sample solution will pour over the
- 551 edge of the round coverslip and seal it to the slide beneath through surface
- 552 tension. Having the round coverslip close to the edge of the slide can provide
- 553 some extra working height. Additionally, gently lowering the square coverslip
- 554 from front to back over the round coverslip until surface tension pulls the round
- 555 cover slip up will help prevent spillover.
- 556 4. Flip the coverslips so the square coverslip is on the bottom. Remove as much liquid as
- 557 possible from between the two cover glasses using a torn kimwipe placed against the
- 558 round one.
- 559 The aim is to flatten the embryos as much as possible without damaging them.
- 560 Samples can be firmly pressed on with a pipette tip as long as the coverslip
- 561 doesn't slide from side to side.
- 562 The ideal depth of an embryo on the slide is ~12-20 um. Signal-to-noise ratio will
- 563 decrease and photobleaching will increase with increasing thickness due to out-of-
- 564 focus light and more image acquisitions, respectively.
- 565 5. Affix the cover slip sandwich to a microscope slide using a Grace Bio-Lab Press-To-Seal
- 566 silicon isolator such that the embryos will be imaged through the square coverslip.
- 567 6. Head off to the microscope!
- 568

---

### 569 3.2 Protocol 2: smFISH or smiFISH alone (Embryo prep + fixation, smFISH or smiFISH,

### 570 slide preparation)

### 571

572 *This protocol describes the workflow for performing smFISH or smiFISH in embryos, from*

573 *sample preparation to slide preparation.*

574

575

#### 576 3.2.1 Embryo Prep and Fixation

- 577       • Perform Embryo prep and fixation as in 3.1.1

578

579   3.2.2 smFISH

- 580       • Perform smFISH as in 3.1.3

581

582   3.2.3. smiFISH

- 583       • Perform smiFISH as in 3.1.3 with the following considerations/exceptions
- 584           ○ The following reagents and protocol is required to generate annealed primary +
- 585           secondary smiFISH probes.

586

587       Reagents

- 588       1. 8-24 gene specific primary probes resuspended at 100 uM in IDTE pH 8.0 (or
- 589       Tris pH 8.0)
- 590       2. 1 Fluorophore-labeled FLAP probe resuspended at 50 uM in Tris pH. 8.0
- 591       3. New England Bio Labs Buffer 3 (or 3.1) (NEB cat. no. B7203S)

592

593       smiFISH probe annealing:

- 594           i. Combine primary probes at equimolar ratio and dilute to 0.833 uM in Tris
- 595           pH 8.0. This primary probe mixture is stable at -20°C indefinitely.

596       In a PCR tube, prepare a solution of:

- 597           ii. 2 uL primary probe set
- 598           iii. 1 uL 50 uM FLAP secondary probe
- 599           iv. 1 uL NEB Buffer 3 (or 3.1)
- 600           v. 6 uL RNase free water

601       Anneal primary probe set to fluorophore-labeled secondary probes using the

602       following thermocycling conditions:

- 603           vi. 1 cycle at 85 °C for 3 minutes
- 604           vii. 1 cycle at 65 °C for 3 minutes
- 605           viii. 1 cycle at 25 °C for 5 minutes

606       Annealed smiFISH probes are viable at -20 °C for up to at least a week.

607       Treat annealed smiFISH probes as diluted smFISH probes. 2 ul annealed smiFISH

608       probe works well for most hybridizations

609

610   3.2.4 Slide Preparation

- 611       • Prepare slides as in 3.1.4

612

613

614

---

615   **3.3 Protocol 3: Immunofluorescence alone (Embryo prep + fixation, immunofluorescence,**

616   **slide preparation)**

617

618   *This protocol describes the steps to perform immunofluorescence in C. elegans embryos from*

619   *harvesting embryos to preparing slides.*

620

621   3.3.1 Embryo Prep and Fixation

- 622       • Perform Embryo prep and fixation as in 3.1.1

623  
624  
625  
626  
627  
628  
629  
630  
631  
632  
633  
634  
635  
636  
637  
638  
639  
640  
641  
642  
643  
644  
645

### 3.3.2. Immunofluorescence

- Perform immunofluorescence as in 3.1.2 with the following exceptions:
  1. At step 15, nutate the sample in 1X PBST for 10 minutes instead of 5.
  2. Pellet embryos by centrifuging at 2000 x g in 30 sec intervals, rotating the tube 180° between each spin until pellet forms.
  3. Pipet or aspirate as much of the supernatant PBST as possible without disrupting the pellet.
  4. Counterstain with 1X PBST containing 2 ul 500 ng/mL DAPI for 10 min.
  5. Pellet embryos by centrifuging at 2000 x g in 30 sec intervals, rotating the tube 180° between each spin until pellet forms.
  6. Pipet or aspirate as much of the supernatant PBST as possible without disrupting the pellet.
  7. Add 1 ml 1X PBST directly to sample and nutate for 10 min to wash out excess DAPI.
  8. Repeat steps 5-7, followed by steps 5 and 6 (for two 1X PBST washes).
  9. Resuspend in 50 uL of mounting medium (or less if the sample is small) and incubate at 4 °C for 30 minutes to ensure antifade penetrance.

### 3.3.3. Slide preparation

- Prepare slides as in 3.1.4

646  
647  
648  
649

---

## **3.3 Protocol 4: Abbreviated protocol for IF/smiFISH for use with nanobodies. (Embryo prep + fixation, simultaneous IF/smiFISH, slide preparation)**

650  
651  
652

*This protocol describes a simplified method for performing immunofluorescence at the same time as smFISH with select antibodies*

653  
654  
655

### 3.3.1 Embryo Prep and Fixation

- Perform Embryo prep and fixation as in 3.1.1.

656  
657  
658

### 3.3.2. Simultaneous immunofluorescence and smFISH

- Perform smFISH as in 3.1.3 with the following exceptions and considerations:
  - This protocol only works with a subset of antibodies.
    - We have had the best results using high-affinity nanobodies, ScFv, or fragmented antibodies<sup>43</sup>. High-affinity, small sized antibodies have improved the success of this simplified protocol in our hands.
    - We have only had success with primary staining using this protocol. Immunofluorescence using secondary antibody amplification during wash steps has not succeeded.
  - At step 2, when preparing the hybridization buffer mix, incorporate the appropriate concentration of antibody and proceed normally.

666  
667  
668

### 3.3.3. Imaging & Analysis



- 669 • Perform imaging & analysis as in 3.1.4 with the following considerations/exceptions
- 670
- 671
- 672

#### 673 **4 CONTROLS AND TROUBLESHOOTING**

674 Validating new probe sets: There are several ways to validate new probe sets for target  
675 specificity and labeling efficiency. The most straightforward test for target specificity is to use  
676 the probes in a wildtype and deletion strain for the target of interest to ensure the probeset is  
677 binding only when the RNA is present. If a deletion allele is not available, RNAi can be utilized  
678 to a similar end. However, it is important to note that residual fluorescent signal may be present  
679 after RNAi because the knockdown may be incomplete or may only partially degrade the targets.  
680 Target specificity can also be determined by targeting a gene with two separate probe sets in  
681 different colors, which should colocalize if the probes are specific. Labeling efficiency of a probe  
682 set can be determined by comparing transcript abundance found using smFISH data to other  
683 sources, such as qRT-PCR, digital-droplet PCR, or quantitative sequencing data.

684  
685 Positive controls: Positive control smFISH probesets should be consistently employed to ensure  
686 the protocol is working. These probe sets have the added benefit of marking specific cell lineages  
687 or developmental stages and thereby identify the embryo's orientation or stage. By comparing  
688 the performance across replicates, researchers can identify outliers or problems in protocol  
689 execution. When troubleshooting, the use of smFISH probe sets that anneal to highly abundant  
690 RNAs, such as the polyA sequence of mRNA, or using previously validated probes can be useful  
691 to ensure the FISH protocol is successful.

692  
693 Photobleaching: Due to the small number of fluorophores on any single RNA, the photolabile  
694 nature of common fluorophores, and the common use of widefield microscopy for FISH  
695 experiments, FISH can often suffer from rapid photobleaching. If a sample has clear puncta that  
696 disappear throughout imaging or the mean intensity of the sample drops rapidly during  
697 acquisition, photobleaching is likely reducing the data's quality. Anti-fade should always be  
698 included in slide preparation and given time to permeate the sample before imaging to prevent  
699 photobleaching. Further, imaging from long, low energy wavelength lasers to short, higher-  
700 energy (i.e., from far-red to UV) can help preserve fluorescence.

701

702 Low Signal to Noise: Since *C. elegans* embryos are relatively thick (~20-30 um), the use of  
703 widefield microscopy will capture a large amount of out-of-focus signals from non-focal z-  
704 planes in the sample. Embryos can be flattened during slide preparation to improve SNR. We  
705 have found that samples from ~12-20 um thick have an optimal signal-to-noise ratio without  
706 obviously perturbing sample morphology. While pressing down on embryos does not seem to  
707 affect their morphology, any lateral motion during slide preparation will shear embryos, so it is  
708 essential to press directly down when making slides.

709

710 Crosstalk of smiFISH secondary probes: Tsanov et al. demonstrated that multiple primary probe  
711 sets containing the same FLAP sequence could be utilized in the same experiment without  
712 observable mislabeling by annealing them to secondary probes labeled with distinct fluorophores  
713 (i.e., probeset-1 FLAP-Y-Cal Fluor 610, probeset-2 FLAP-Y-Quasar 670). We have validated  
714 this in the *C. elegans* embryo.

715

716 Probing for short transcripts: If a transcript is too short to design ample FISH probes, it can be  
717 worrisome to order probesets. We have obtained clear punctate signal for probe sets using as few  
718 as eight smiFISH probes. If a transcript is too short for even eight probes, it is worth considering  
719 amplification-based FISH methods<sup>37,44-46</sup>, which have been utilized in *C. elegans*<sup>47</sup>. However,  
720 quantification of amplification-based FISH is far less accurate due to variability in signal  
721 strength from single RNA molecules.

722

723 smiFISH secondary aggregates: In some instances, we and other groups (personal comm) have  
724 observed large aggregates of fluorescently labeled secondary smiFISH probes on the surface of  
725 cells or adhered to slides. In our experience, vortexing annealed smiFISH probes followed by a  
726 quick centrifugation in a microfuge before hybridization and vigorous vortexing of samples after  
727 hybridization are sufficient to remove these large aggregates.

728

729 Validation of antibodies: With any IF experiment, it is essential to validate the antibodies'  
730 function and specificity. Primary antibodies can be validated using null or RNAi strains to ensure  
731 that the antibody is binding specifically to the target antigen. Secondary antibodies can be tested



732 for specificity by incubating them in the absence of primary antibodies to ensure that there is no  
733 staining of endogenous antigens. Should an antibody have some non-specific binding, it may be  
734 possible to increase specificity by depleting the antibody using a null allele<sup>11</sup>. It is also necessary  
735 to test every antibody's sensitivity over a range of concentrations to identify the optimal  
736 concentration for detecting the antigen of interest without promoting non-specific staining,  
737 typically over at least one to two orders of magnitude. Most commercial antibodies have a range  
738 of suggested optimal concentrations for immunofluorescence that can be used as a starting point.  
739 It is wise to test these concentrations for each experiment or experimental condition because  
740 changes in protein concentration or antigen accessibility can lead to different optimal  
741 concentrations of antibodies on a case-by-case basis. It is important to be aware that this can  
742 make downstream quantification inaccurate; however, so it is beneficial to use identical staining  
743 conditions when possible.

744

745 Low yield: If embryo yield is low after performing IF, ensure that detergent is being used in the  
746 wash steps as it strongly reduces adherence to pipette tips and plastic tubes .

747

748 Positive controls: If a protein can not be detected using a validated antibody, it is crucial to  
749 ensure that IF is working correctly. Staining common cytoskeletal components such as actin or  
750 microtubules can both verify the efficacy of the IF protocol in a sample while simultaneously  
751 demonstrating the sample is morphologically intact. Alternatively, a fluorescent protein, such as  
752 GFP, can be targeted for immunofluorescence using a different color and colocalization analyzed  
753 to ensure effective staining.

754

755 RNA degradation: The most common issue in performing combined IF/FISH is RNA  
756 degradation. It is essential to use RNase-free reagents throughout the protocol and, when  
757 necessary, to add RNase inhibitors such as RNasin. In our experience, RNase inhibitor was only  
758 necessary during steps where BSA is present (which contains RNases). However, if RNA is not  
759 visible after performing IF/FISH, it is likely due to RNase contamination. Remaking reagents  
760 with RNase-free components or adding RNase inhibitors at each step will likely remedy this  
761 issue. As RNase inhibitor is relatively expensive, it is best to ensure the purity of reagents where  
762 possible. If RNA degradation continues to be an issue, reducing the duration of the IF steps of

763 the protocol tends to improve RNA signal at the cost of protein signal. For example, performing  
764 a two-hour incubation with primary antibody instead of overnight can reduce RNA degradation.

765

766 Permeabilization and fixation: *C. elegans* embryos are highly effective at preventing  
767 environmental contaminants from entering. This is in part due to the permeability barrier, a  
768 membranous barrier that prevents fluid exchange between the embryo and the environment<sup>12</sup>.  
769 The choice of fixative and fixation duration appear to be highly important for permeabilizing the  
770 embryo to antibodies, which are roughly 20X the mass and radius of smFISH probes (Ab ~ 150  
771 kDa and ~ 60 Å, 20mer oligo ~ 7.5 kDa and ~ 3 Å<sup>48,49</sup>). In our experience, a brief methanol  
772 fixation, liquid nitrogen freeze cracking, followed by a quick acetone fixation, was most  
773 effective at allowing antibodies to pass through the eggshell and permeability barrier while  
774 maintaining antigen recognition and FISH probe accessibility. The use of acetone was necessary  
775 for antibody staining. We interpret this result as acetone solubilizing permeability barrier  
776 components, thus increasing the size of molecules that can enter the embryo, although we have  
777 not rigorously examined the effective pore size under different fixation conditions. Our  
778 experiments with longer fixation times with both methanol and acetone reduced antigen  
779 recognition by antibodies (as well as GFP fluorescence for protein fusions). Moreover, the use of  
780 formalin/formaldehyde reduces the binding and photostability of FISH probes. Some antigens  
781 are likely more compatible with different fixatives, however. Should the fixation conditions  
782 presented here be incompatible with an antigen of interest, Duerr 2006<sup>11</sup> describes alternative  
783 fixation strategies. If alternative fixation strategies must be pursued, it is crucial to keep in mind  
784 the effect they will have on the permeability of the eggshell and permeability barrier. If IF still  
785 fails, it may be worth using 150kDa fluorescent dextran to determine whether the embryo is  
786 permeable to antibodies.

787

788 Clumps: For reasons unknown, in our experiments, *C. elegans* embryos that have undergone  
789 IF/FISH form aggregates of embryos that do not occur with either protocol alone. While some  
790 clumping seems inevitable, vigorous vortexing after fixation and every wash/pelleting step, as  
791 well as constant rocking during incubations, reduces the number and size of clumps. Clumps can  
792 also be disrupted by pipetting when preparing slides.

793

794

795 **FIGURE LEGENDS:**

796

797 **Figure 1. Schematic illustration of IF, FISH, and IF/FISH protocols**

798 An overview illustrating the workflow of the sequential IF/FISH (Protocol 1), RNA FISH  
799 (Protocol 2), IF (Protocol 3), and simultaneous IF/FISH (Protocol 4) protocols from sample  
800 preparation to slide preparation.

801

802 **Figure 2. Simplified immunofluorescence in *C. elegans* embryos**

803 Immunofluorescence was performed on N2 embryos as described (Protocol 3). Embryos were  
804 incubated with 1:20 dilutions of K76 (DHSB, Antibody registry ID AB\_531836) (**A**) or 1:1000  
805 dilutions 2A4 (DHSB, Antibody Registry ID: AB\_2618114) (**B**) primary antibodies followed by  
806 incubation with 1:250 dilutions of Alexa Fluor Goat Anti-Mouse secondary antibody (Jackson  
807 ImmunoResearch, Antibody Registry ID: AB\_2338840) (green). In the presence of K76 (anti-  
808 PGL-1), P granules are observed (**A, top**), while 2A4 (anti-ELT-2) stained the intestine-specific  
809 ELT-2 transcription factor (**B, top**). Non-specific binding of the secondary was not observed in  
810 either instance (**A, B, bottom**). Three biological replicates were performed for each experiment.  
811 Scale bars represent 10  $\mu\text{m}$ .

812

813 **Figure 3. smFISH and smiFISH in *C. elegans* embryos**

814 **A.** Schematic illustration of smFISH probes. **B.** Schematic illustration of smiFISH probes. **C.**  
815 *nos-2* RNA was visualized using smiFISH (magenta) and smFISH (green). *nos-2* smiFISH  
816 primary probes used FLAP-Y sequences and the secondary FLAP-Y probe was 5' and 3' dual-  
817 conjugated with Quasar 670 fluorophores. *nos-2* smFISH probes were 3' single-conjugated with  
818 Cal Fluor 610. **D.** *imb-2* RNA was visualized using smFISH (magenta) and smiFISH (green).  
819 *imb-2* smFISH probes were 3' single-conjugated with Quasar 670 fluorophores. *imb-2* smiFISH  
820 primary probes used FLAP-Y sequences and the secondary FLAP-Y probe was 5' and 3' dual-  
821 conjugated with Cal Fluor 610. Embryos were counterstained with DAPI in blue (**C, D**). Three  
822 biological replicates were performed for each experiment using newly annealed smiFISH probes  
823 for each replicate. Scale bars represent 10  $\mu\text{m}$ .

824

825 **Figure 4. Stellaris buffers provide higher signal-to-noise ratios than homebrew buffers**

826 Signal-to-noise ratios were calculated for each RNA puncta identified when smFISH was  
827 performed using homebrew (red) or commercial Stellaris (blue) buffers. The signal-to-noise ratio  
828 was calculated by identifying RNA spots using FISHquant<sup>28</sup> before using the ImJoy SNR plugin  
829 (REF if published). In short, the SNR plugin compares the intensity at the coordinates of RNA  
830 puncta identified by FISHquant to the average intensity of a sphere surrounding the spot to  
831 calculate SNR. Four Stellaris smFISH probe sets were used, *erm-1* conjugated to Cal Fluor 610,  
832 *imb-2* conjugated to Quasar 670, *nos-2* conjugated to Quasar 670, and *set-3* conjugated to Cal  
833 Fluor 610. Individual dots represent the average SNR in one embryo. Three biological replicates  
834 were performed for each experiment, and 15 embryos were quantified for each condition. P  
835 values from Benjamini-Hochberg corrected t-tests are shown (0.05 > \* > 0.005 > \*\* > 0.0005 >  
836 \*\*\* > 0.00005).

837

838 **Figure 5. Effect of anti-fade composition on smFISH signal intensity**

839 The mean fluorescence intensity of smFISH signal over 100 exposures was measured in embryos  
840 using various antifades and their combinations. Experiments were performed using four different  
841 smFISH probe sets: *erm-1* conjugated to Cal Fluor 610, *imb-2* conjugated to Quasar 670, *nos-2*  
842 conjugated to Quasar 670, and *set-3* conjugated to Cal Fluor 610). **A.** The average mean intensity  
843 throughout imaging was normalized to the intensity of first acquisition for each embryo. The  
844 shaded region represents the standard error of the mean for each exposure. Three biological  
845 replicates were performed for each experiment, and no less than nine embryos were quantified  
846 for each condition. **B.** Representative images of the first and final acquisitions for *imb-2* (top)  
847 and *erm-1* (bottom) RNAs using VECTASHIELD and N-propyl gallate (left), VECTASHIELD  
848 only (middle), and ProLong Diamond (right) anti-fades.

849

850 **Figure 6. Sequential IF/FISH**

851 Immunofluorescence followed by smFISH was performed on N2 embryos. IF was performed  
852 using K76 (**A and B**) or 2A4 (**C**) primary antibodies to identify PGL-1 containing P granules and  
853 ELT-2 protein (magenta), respectively. smFISH was used to simultaneously detect the P granule  
854 constituent RNAs *nos-2* (**A**) and *cpg-2* (**B**), or *elt-2* mRNA (**C**), all in magenta. Embryos were  
855 counterstained with DAPI (blue). Three biological replicates were performed for each

856 experiment. Scale bars represent 10  $\mu$ m.

857

### 858 **Figure 7. Simultaneous IF/FISH**

859 smFISH was performed on N2 embryos with the addition of anti-GFP nanobody to hybridization  
860 buffer. *nos-2* mRNA (magenta) was probed using smFISH probes conjugated to Quasar 670.

861 PATR-1::GFP (green) signal was visualized using 2.37 ug/ml Janelia Fluor 549 (Tocris 6147)

862 conjugated anti-GFP nanobody (Chromotek, gt-250) (top). A no nanobody control is also shown

863 (bottom). DNA was counterstained with DAPI (blue). Three biological replicates were

864 performed for each experiment. Scale bars represent 10  $\mu$ m.

865

### 866 **ACKNOWLEDGEMENTS**

867 We would like to thank Rob Williams and Wyatt Beyers for fruitful discussions about fixation  
868 methods and quantification strategies. We also thank Dustin Updike and James McGhee for

869 reagents. A great thanks goes out to the entire ImJoy development team for making an invaluable

870 platform for data analysis. In particular, we extend our appreciation to Florian Mueller for help

871 designing analysis pipelines, providing helpful insights, and feedback on the manuscript. Some

872 strains were provided by the *Caenorhabditis* Genetics Center, which is funded by National

873 Institutes of Health Office of Research Infrastructure Programs (P40 OD010440). Dylan Parker

874 and Lindsay Winkenbach were supported in part by an NSF training grant (DGE-1450032).

875

### 876 **COMPETING INTERESTS**

877

878 The authors have no competing interests.

879

### 880 **FUNDING:**

881

| 882 | <u>Funder</u>                 | <u>Grant reference number</u> | <u>Author</u>          |
|-----|-------------------------------|-------------------------------|------------------------|
| 883 | National Institutes of Health | R35GM124877                   | Erin Osborne Nishimura |
| 884 | NSF GAUSSI training grant     | DGE-1450032                   | Dylan Parker           |
| 885 | NSF GAUSSI training grant     | DGE-1450032                   | Lindsay Winkenbach     |

886

887

888 **AUTHOR CONTRIBUTIONS:**

889 Conceptualization: D.M.P., L.P.W., S.B., E.O.N.; Methodology: D.M.P., L.P.W., S.B., E.O.N.;  
890 Software: D.M.P., E.O.N.; Validation: D.M.P., L.P.W., S.B., E.O.N.; Formal analysis: D.M.P.,  
891 A.P.; Investigation: D.M.P., L.P.W., S.B., A.P., E.O.N.; Resources: D.M.P., E.O.N.; Data  
892 curation: D.M.P., L.P.W., S.B., A.P.; Writing - original draft: D.M.P., E.O.N.; Writing - review  
893 & editing: D.M.P., L.P.W., S.B., A.P., E.O.N.; Visualization: D.M.P., L.P.W., S.B., E.O.N.;  
894 Supervision: D.M.P., E.O.N.; Project administration: D.M.P., E.O.N.; Funding acquisition:  
895 D.M.P., L.P.W., E.O.N.

896

897

898 **AUTHOR ORCIDs:**

899

|     |                        |                                                                                           |
|-----|------------------------|-------------------------------------------------------------------------------------------|
| 900 | Dylan M. Parker        | <a href="https://orcid.org/0000-0002-4910-4113">https://orcid.org/0000-0002-4910-4113</a> |
| 901 | Lindsay P. Winkenbach  | <a href="https://orcid.org/0000-0002-1766-3260">https://orcid.org/0000-0002-1766-3260</a> |
| 902 | Annemarie Parker       | <a href="https://orcid.org/0000-0001-7161-0082">https://orcid.org/0000-0001-7161-0082</a> |
| 903 | Sam Boyson             | <a href="https://orcid.org/0000-0002-5434-5915">https://orcid.org/0000-0002-5434-5915</a> |
| 904 | Erin Osborne Nishimura | <a href="https://orcid.org/0000-0002-4313-4573">https://orcid.org/0000-0002-4313-4573</a> |

905

906

907 **REFERENCES**

908

- 909 1. Toki, M. I., Cecchi, F., Hembrough, T., Syrigos, K. N. & Rimm, D. L. Proof of the  
910 quantitative potential of immunofluorescence by mass spectrometry. *Lab Invest* **97**, 329–334  
911 (2017).
- 912 2. Trcek, T., Rahman, S. & Zenklusen, D. mRNA Decay, Methods and Protocols. *Methods Mol*  
913 *Biology* **1720**, 35–54 (2017).
- 914 3. Levesque, M. J. & Raj, A. Single-chromosome transcriptional profiling reveals chromosomal  
915 gene expression regulation. *Nat Methods* **10**, 246–248 (2013).
- 916 4. Perez-Burgos, L. *et al.* Generation and Characterization of Methyl-Lysine Histone Antibodies.  
917 *Methods Enzymol* **376**, 234–254 (2003).

- 918 5. Parker, D. M. *et al.* mRNA localization is linked to translation regulation in the  
919 *Caenorhabditis elegans* germ lineage. *Development* **147**, dev186817 (2020).
- 920 6. Femino, A. M., Fay, F. S., Fogarty, K. & Singer, R. H. Visualization of Single RNA  
921 Transcripts in Situ. *Science* **280**, 585–590 (1998).
- 922 7. Orjalo, A., Johansson, H. E. & Ruth, J. L. Stellaris™ fluorescence in situ hybridization (FISH)  
923 probes: a powerful tool for mRNA detection. *Nat Methods* **8**, i–ii (2011).
- 924 8. Raj, A., Bogaard, P. van den, Rifkin, S. A., Oudenaarden, A. van & Tyagi, S. Imaging  
925 individual mRNA molecules using multiple singly labeled probes. *Nat Methods* **5**, 877–879  
926 (2008).
- 927 9. Ji, N. & Oudenaarden, A. van. Single molecule fluorescent in situ hybridization (smFISH) of  
928 *C. elegans* worms and embryos. *Wormbook* 1–16 (2012) doi:10.1895/wormbook.1.153.1.
- 929 10. Tsanov, N. *et al.* smiFISH and FISH-quant – a flexible single RNA detection approach with  
930 super-resolution capability. *Nucleic Acids Res* **44**, e165–e165 (2016).
- 931 11. Duerr, J. Immunohistochemistry. *Wormbook* (2006) doi:10.1895/wormbook.1.105.1.
- 932 12. Olson, S. K., Greenan, G., Desai, A., Müller-Reichert, T. & Oegema, K. Hierarchical  
933 assembly of the eggshell and permeability barrier in *C. elegans*. *J Cell Biology* **198**, 731–748  
934 (2012).
- 935 13. Duerr, J. S. Antibody Staining in *C. Elegans* Using “Freeze-  
936 Cracking”; *J Vis Exp* (2013) doi:10.3791/50664.
- 937 14. Williams, C. *et al.* A High Frequency of Sequence Alterations Is Due to Formalin Fixation of  
938 Archival Specimens. *Am J Pathology* **155**, 1467–1471 (1999).
- 939 15. Masuda, N., Ohnishi, T., Kawamoto, S., Monden, M. & Okubo, K. Analysis of chemical  
940 modification of RNA from formalin-fixed samples and optimization of molecular biology  
941 applications for such samples. *Nucleic Acids Res* **27**, 4436–4443 (1999).
- 942 16. Srinivasan, M., Sedmak, D. & Jewell, S. Effect of Fixatives and Tissue Processing on the  
943 Content and Integrity of Nucleic Acids. *Am J Pathology* **161**, 1961–1971 (2002).
- 944 17. Hoetelmans, R. W. M. *et al.* Effects of Acetone, Methanol, or Paraformaldehyde on Cellular  
945 Structure, Visualized by Reflection Contrast Microscopy and Transmission and Scanning  
946 Electron Microscopy. *Appl Immunohisto M M* **9**, 346–351 (2001).
- 947 18. Vielkind, U. & Swierenga, S. H. A simple fixation procedure for immunofluorescent  
948 detection of different cytoskeletal components within the same cell. *Histochemistry* **91**, 81–88  
949 (1989).



- 950 19. Levitt, D. & King, M. Methanol fixation permits flow cytometric analysis of  
951 immunofluorescent stained intracellular antigens. *J Immunol Methods* **96**, 233–237 (1987).
- 952 20. Strome, S. & Wood, W. B. Immunofluorescence visualization of germ-line-specific  
953 cytoplasmic granules in embryos, larvae, and adults of *Caenorhabditis elegans*. *Proc National*  
954 *Acad Sci* **79**, 1558–1562 (1982).
- 955 21. Ward, S. & Klass, M. The location of the major protein in *Caenorhabditis elegans* sperm and  
956 spermatocytes. *Dev Biol* **92**, 203–208 (1982).
- 957 22. Wiesenfahrt, T. *et al.* The function and regulation of the GATA factor ELT-2 in the *C.*  
958 *elegans* endoderm. *Development* **143**, 483–491 (2015).
- 959 23. Greenbaum, L., Rothmann, C., Lavie, R. & Malik, Z. Green Fluorescent Protein  
960 Photobleaching: a Model for Protein Damage by Endogenous and Exogenous Singlet Oxygen.  
961 *Biol Chem* **381**, 1251–1258 (2000).
- 962 24. Bayer, L. V., Batish, M., Formel, S. K. & Bratu, D. P. *Drosophila* Oogenesis, Methods and  
963 Protocols. *Methods Mol Biology* **1328**, 125–136 (2015).
- 964 25. Okamoto, I. X-Chromosome Inactivation, Methods and Protocols. *Methods Mol Biology*  
965 **1861**, 149–159 (2018).
- 966 26. Calvo, L., Ronshaugen, M. & Pettini, T. smiFISH and embryo segmentation for single-cell  
967 multi-gene RNA quantification in arthropods. *Commun Biology* **4**, 352 (2021).
- 968 27. Yoon, D. S., Pendergrass, D. L. & Lee, M.-H. A simple and rapid method for combining  
969 fluorescent in situ RNA hybridization (FISH) and immunofluorescence in the *C. elegans*  
970 germline. *Methodsx* **3**, 378–385 (2016).
- 971 28. Mueller, F. *et al.* FISH-quant: automatic counting of transcripts in 3D FISH images. *Nat*  
972 *Methods* **10**, 277–278 (2013).
- 973 29. Safieddine, A. *et al.* A choreography of centrosomal mRNAs reveals a conserved localization  
974 mechanism involving active polysome transport. *Nat Commun* **12**, 1352 (2021).
- 975 30. Chouaib, R. *et al.* A Dual Protein-mRNA Localization Screen Reveals Compartmentalized  
976 Translation and Widespread Co-translational RNA Targeting. *Dev Cell* **54**, 773-791.e5 (2020).
- 977 31. Samacoits, A. *et al.* A computational framework to study sub-cellular RNA localization. *Nat*  
978 *Commun* **9**, 4584 (2018).
- 979 32. Ouyang, W., Mueller, F., Hjelmare, M., Lundberg, E. & Zimmer, C. ImJoy: an open-source  
980 computational platform for the deep learning era. *Nat Methods* **16**, 1199–1200 (2019).



- 981 33. Querido, E., Dekakra-Bellili, L. & Chartrand, P. RNA fluorescence in situ hybridization for  
982 high-content screening. *Methods* **126**, 149–155 (2017).
- 983 34. Moffitt, J. R. *et al.* High-throughput single-cell gene-expression profiling with multiplexed  
984 error-robust fluorescence in situ hybridization. *Proc National Acad Sci* **113**, 11046–11051  
985 (2016).
- 986 35. Lubeck, E., Coskun, A. F., Zhiyentayev, T., Ahmad, M. & Cai, L. Single-cell in situ RNA  
987 profiling by sequential hybridization. *Nat Methods* **11**, 360–361 (2014).
- 988 36. Eng, C.-H. L. *et al.* Transcriptome-scale super-resolved imaging in tissues by RNA  
989 seqFISH+. *Nature* **568**, 235–239 (2019).
- 990 37. Xia, C., Babcock, H. P., Moffitt, J. R. & Zhuang, X. Multiplexed detection of RNA using  
991 MERFISH and branched DNA amplification. *Sci Rep-uk* **9**, 7721 (2019).
- 992 38. Perkel, J. M. Starfish enterprise: finding RNA patterns in single cells. *Nature* **572**, 549–551  
993 (2019).
- 994 39. Schindelin, J. *et al.* Fiji: an open-source platform for biological-image analysis. *Nat Methods*  
995 **9**, 676–682 (2012).
- 996 40. Schneider, C. A., Rasband, W. S. & Eliceiri, K. W. NIH Image to ImageJ: 25 years of image  
997 analysis. *Nat Methods* **9**, 671–675 (2012).
- 998 41. Dunn, K. W., Kamocka, M. M. & McDonald, J. H. A practical guide to evaluating  
999 colocalization in biological microscopy. *Am J Physiol-cell Ph* **300**, C723–C742 (2011).
- 1000 42. Porta-de-la-Riva, M., Fontrodona, L., Villanueva, A. & Cerón, J. Basic *Caenorhabditis*  
1001 *elegans* Methods: Synchronization and Observation. *J Vis Exp* e4019 (2012)  
1002 doi:10.3791/4019.
- 1003 43. Doshi, R. *et al.* In vitro nanobody discovery for integral membrane protein targets. *Sci Rep-*  
1004 *uk* **4**, 6760 (2014).
- 1005 44. Choi, H. M. T. *et al.* Third-generation in situ hybridization chain reaction: multiplexed,  
1006 quantitative, sensitive, versatile, robust. *Development* **145**, dev165753 (2018).
- 1007 45. Marras, S. A. E., Bushkin, Y. & Tyagi, S. High-fidelity amplified FISH for the detection and  
1008 allelic discrimination of single mRNA molecules. *Proc National Acad Sci* **116**, 13921–13926  
1009 (2019).
- 1010 46. Wang, F. *et al.* RNAscope A Novel in Situ RNA Analysis Platform for Formalin-Fixed,  
1011 Paraffin-Embedded Tissues. *J Mol Diagnostics* **14**, 22–29 (2012).

- 1012 47. Choi, H. M. T. *et al.* Mapping a multiplexed zoo of mRNA expression. *Development* **143**,  
1013 3632–3637 (2016).
- 1014 48. Fernandes, M. X., Ortega, A., Martínez, M. C. L. & Torre, J. G. de la. Calculation of  
1015 hydrodynamic properties of small nucleic acids from their atomic structure. *Nucleic Acids Res*  
1016 **30**, 1782–1788 (2002).
- 1017 49. Hawe, A., Hulse, W. L., Jiskoot, W. & Forbes, R. T. Taylor Dispersion Analysis Compared  
1018 to Dynamic Light Scattering for the Size Analysis of Therapeutic Peptides and Proteins and  
1019 Their Aggregates. *Pharmaceut Res* **28**, 2302–2310 (2011).
- 1020

### Sample Preparation

#### **Protocol 1: 3.1.1**

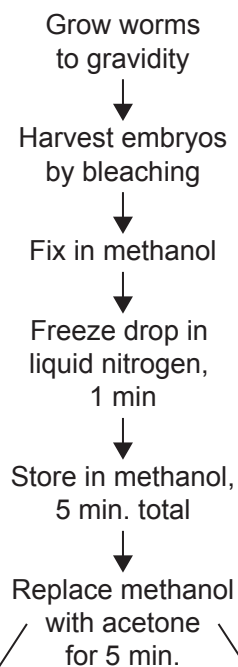

### Immunofluorescence

#### **Protocol 1: 3.1.2**

or Protocol 3

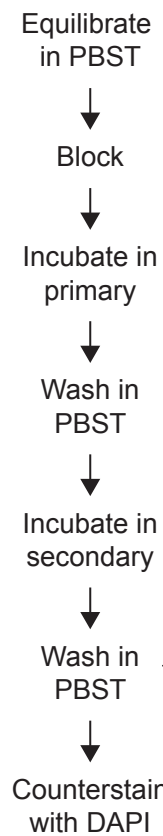

### RNA FISH

#### **Protocol 1: 3.1.3**

or Protocol 2

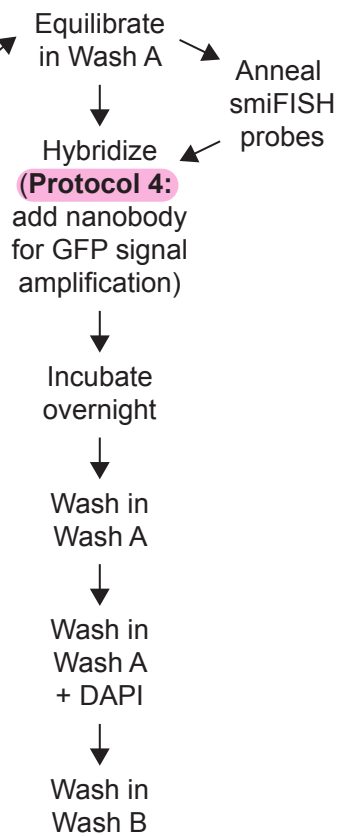

Anneal smiFISH probes

**Protocol 4:** add nanobody for GFP signal amplification)

Wash in 2X SSC

Wash in PBST

Wash in PBST

Wash in PBST

Slide prep and image!

#### **Protocol 1: 3.1.4**



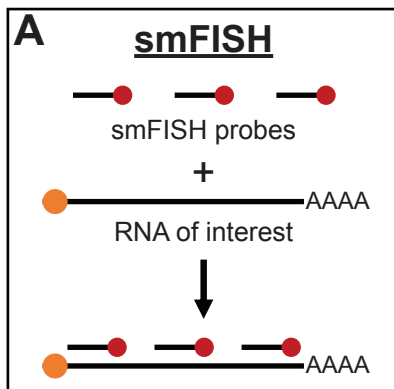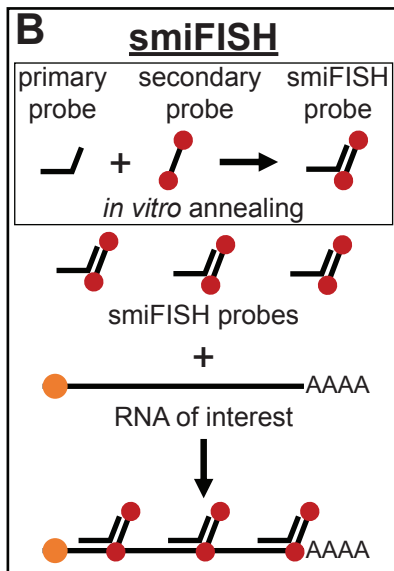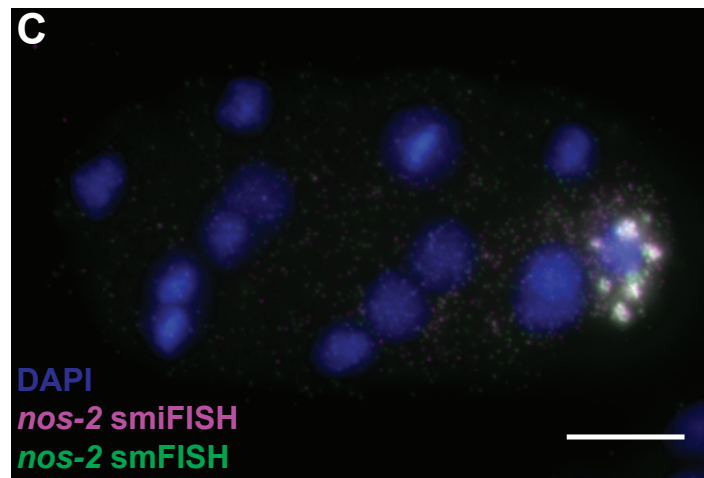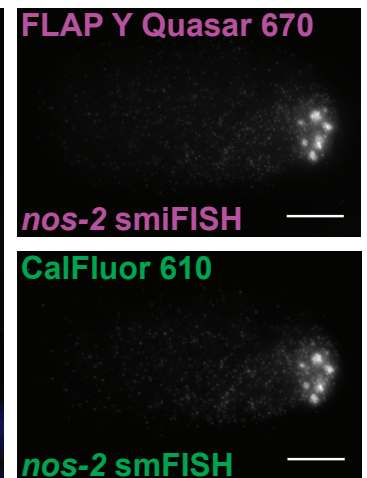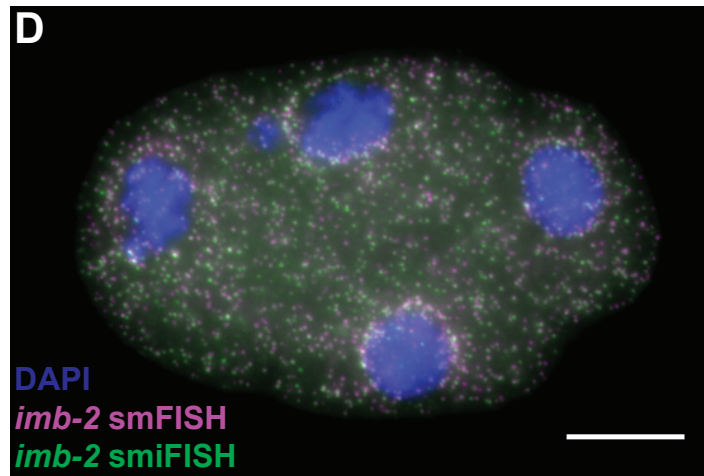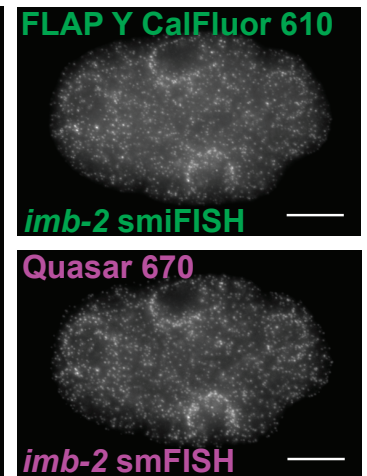

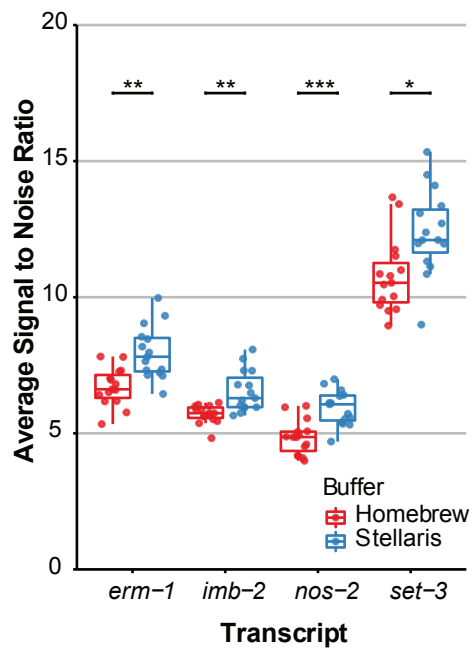

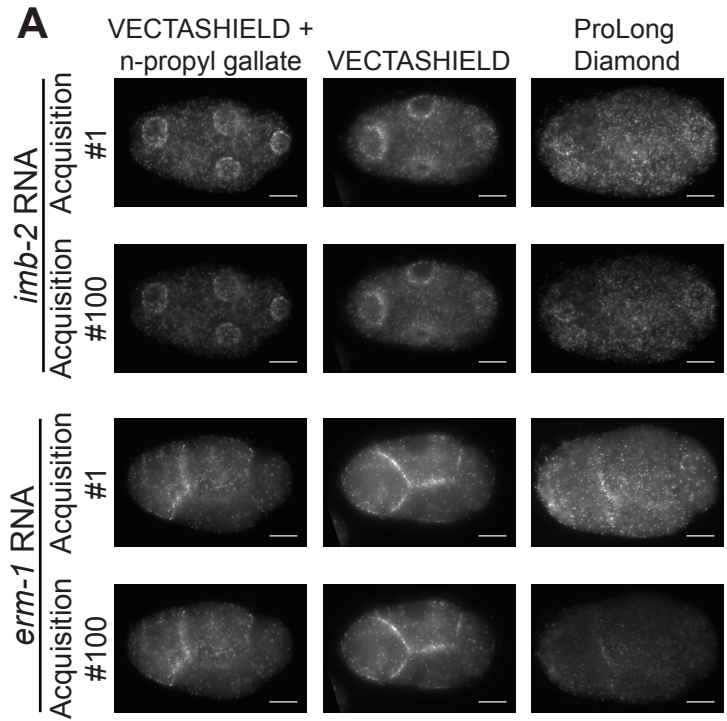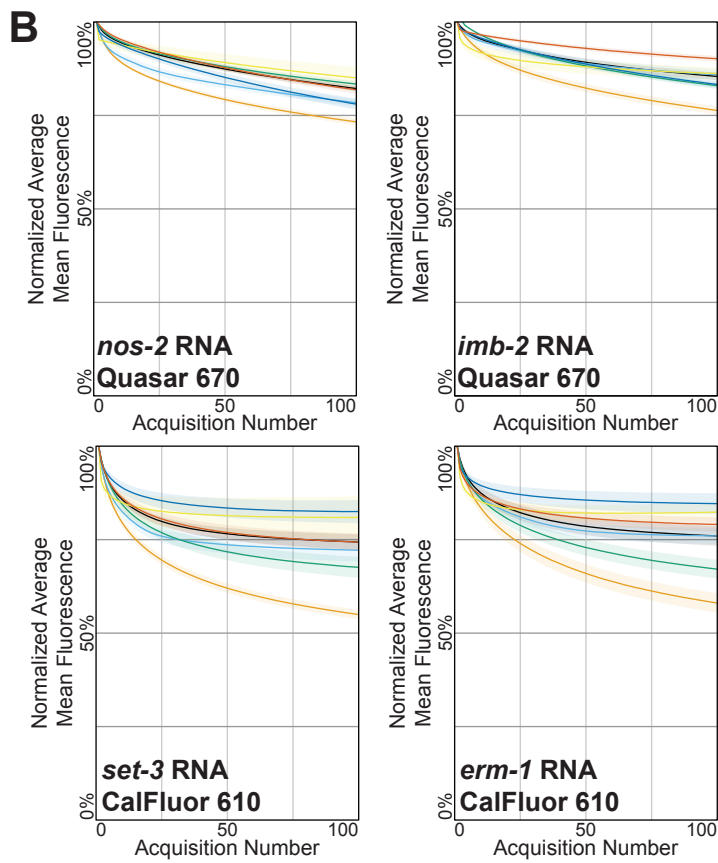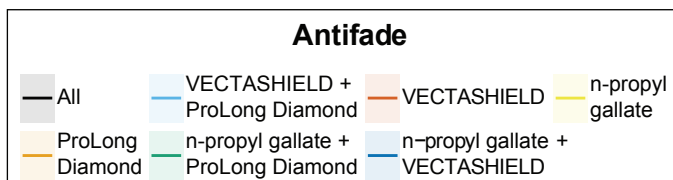

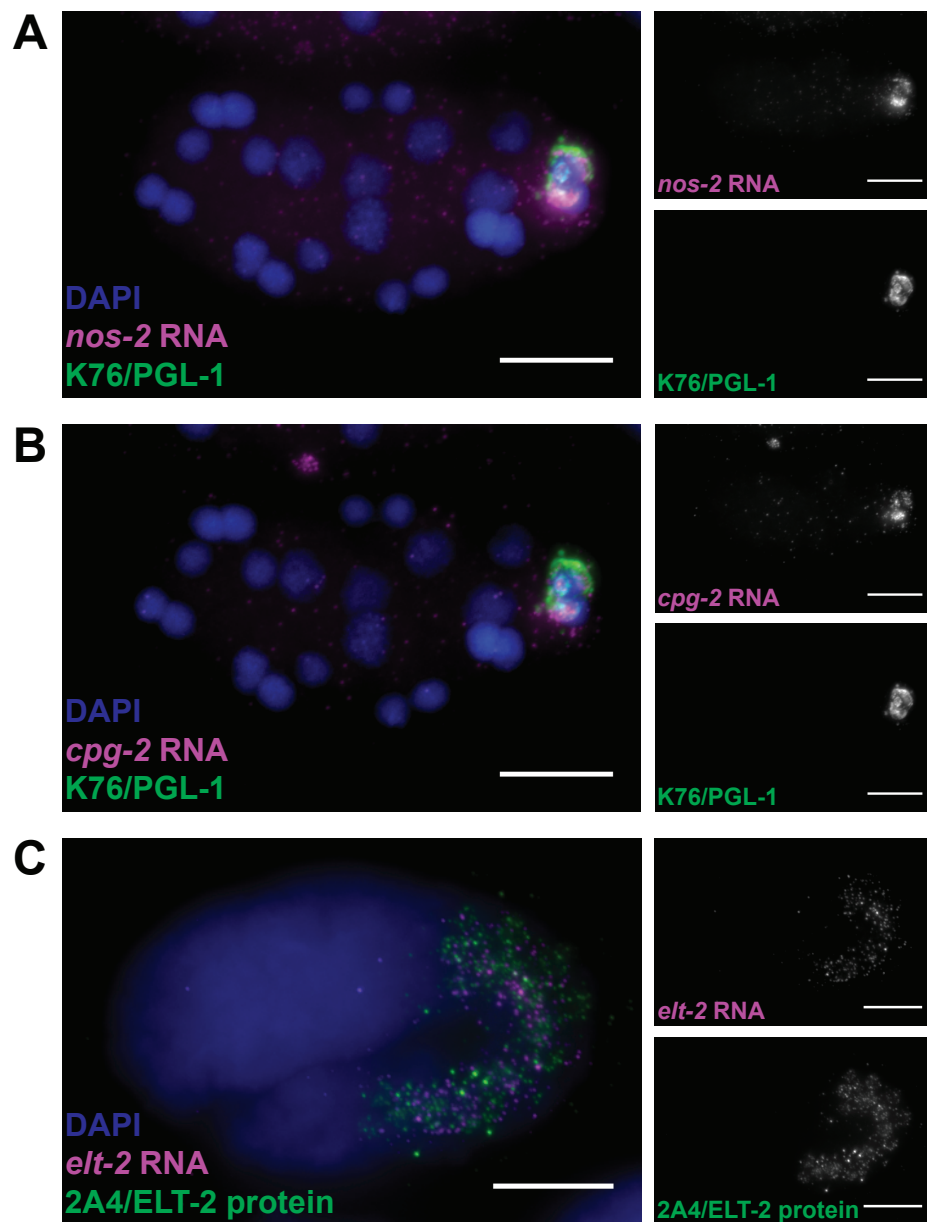



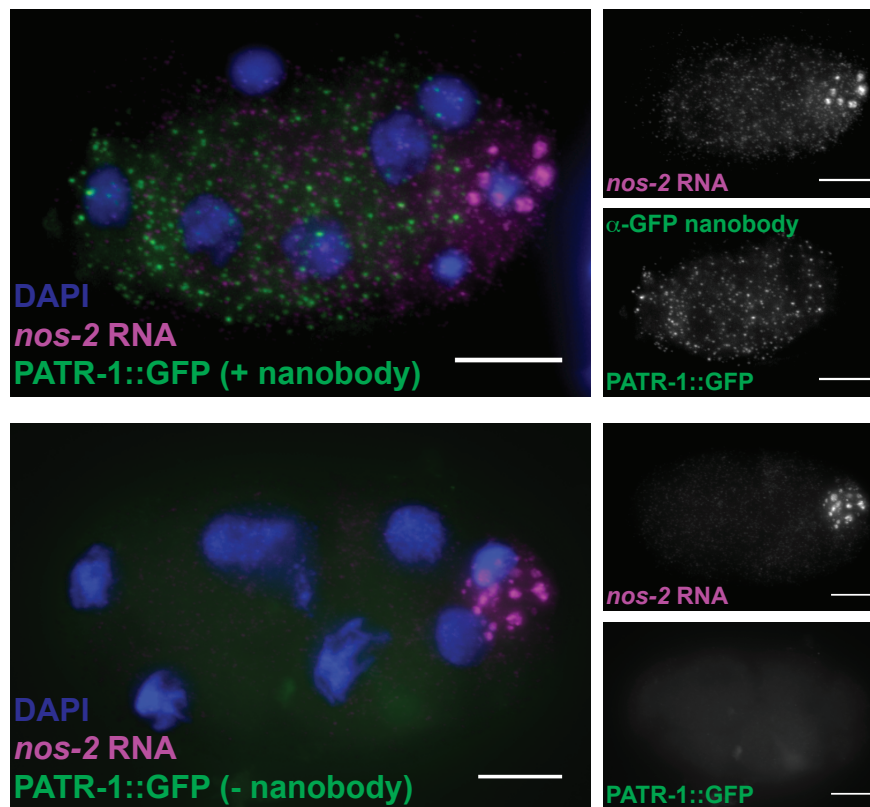

Source: http://biorxiv.org/content/10.1101/2021.05.07.443170v1.full.pdf
